# Supplementary material
Source: Elsevier journal article supplement (https://comptes-rendus.academie-sciences.fr/biologies/article/10.1016/j.crvi.2018.04.002/file/attach/mmc1.pdf)
Supplement: mmc1 [file mmc1.pdf]

Supplementary Table 1.

Summary of Adult male Babirusa skull museum and collection IDs. Also included is the ID assigned to each skull (AAMID), the Indonesian region of origin, and the tooth group assigned based on according to the position of the tip of the tooth over the bones of the skull

| AAMID   | Indonesian region | Museum                                  | Country         | Museum ID     | Tooth Group |
|---------|-------------------|-----------------------------------------|-----------------|---------------|-------------|
| AAM0002 | Sulawesi          | Zoological Museum Amsterdam             | The Netherlands | 345           | E           |
| AAM0012 | Sulawesi          | Zoological Museum Amsterdam             | The Netherlands | 916           | D           |
| AAM0021 | Buru              | Zoological Museum Amsterdam             | The Netherlands | ZMA.MAM.01856 | E           |
| AAM0026 | Buru              | Zoological Museum Amsterdam             | The Netherlands | ZMA.MAM.09111 | B           |
| AAM0027 | Buru              | Zoological Museum Amsterdam             | The Netherlands | ZMA.MAM.09112 | D           |
| AAM0028 | Buru              | Zoological Museum Amsterdam             | The Netherlands | ZMA.MAM.09113 | E           |
| AAM0032 | Sulawesi          | Zoological Museum Amsterdam             | The Netherlands | 9117          | E           |
| AAM0057 | Sulawesi          | Naturhistorisches Museum Basel          | Switzerland     | C.2880        | B           |
| AAM0059 | Sulawesi          | Naturhistorisches Museum Basel          | Switzerland     | C.2882        | B           |
| AAM0063 | Buru              | Naturhistorisches Museum Basel          | Switzerland     | C.3033        | B           |
| AAM0064 | Buru              | Naturhistorisches Museum Basel          | Switzerland     | C.3034        | C           |
| AAM0088 | Buru              | Museum für Naturkunde, Berlin           | Germany         | 10428         | C           |
| AAM0091 | Sulawesi          | Museum für Naturkunde, Berlin           | Germany         | 20437         | A           |
| AAM0095 | Sulawesi          | Museum für Naturkunde, Berlin           | Germany         | 38828         | Figure      |
| AAM0101 | Sulawesi          | Museum für Naturkunde, Berlin           | Germany         | 64493         | E           |
| AAM0102 | Sulawesi          | Museum für Naturkunde, Berlin           | Germany         | 64501         | Figure      |
| AAM0105 | Sulawesi          | Museum für Naturkunde, Berlin           | Germany         | 64557         | A           |
| AAM0107 | Buru              | Museum für Naturkunde, Berlin           | Germany         | 64559         | D           |
| AAM0110 | Buru              | Museum für Naturkunde, Berlin           | Germany         | A2622         | C           |
| AAM0111 | Buru              | Museum für Naturkunde, Berlin           | Germany         | A2623         | E           |
| AAM0123 | Sulawesi          | University Museum of Zoology, Cambridge | England         | H.12998       | D           |
| AAM0124 | Sulawesi          | University Museum of Zoology, Cambridge | England         | H.12999       | A           |
| AAM0126 | Sulawesi          | University Museum of Zoology, Cambridge | England         | H.13002       | E           |
| AAM0133 | Sulawesi          | The Field Museum, Chicago               | USA             | 31746         | D           |
| AAM0137 | Buru              | Museum Zoologicum Bogoriense, Cibinong  | Indonesia       | 1081          | D           |
| AAM0138 | Buru              | Museum Zoologicum Bogoriense, Cibinong  | Indonesia       | 1082          | B           |
| AAM0139 | Buru              | Museum Zoologicum Bogoriense, Cibinong  | Indonesia       | 1083          | D           |
| AAM0140 | Buru              | Museum Zoologicum Bogoriense, Cibinong  | Indonesia       | 1084          | E           |
| AAM0141 | Buru              | Museum Zoologicum Bogoriense, Cibinong  | Indonesia       | 1085          | E           |
| AAM0145 | Sulawesi          | Museum Zoologicum Bogoriense, Cibinong  | Indonesia       | 2735          | E           |
| AAM0150 | Togian Islands    | Museum Zoologicum Bogoriense, Cibinong  | Indonesia       | 6899          | A           |
| AAM0151 | Sulawesi          | Museum Zoologicum Bogoriense, Cibinong  | Indonesia       | 6901          | C           |
| AAM0152 | Sulawesi          | Museum Zoologicum Bogoriense, Cibinong  | Indonesia       | 6902          | E           |
| AAM0155 | Sulawesi          | Museum Zoologicum Bogoriense, Cibinong  | Indonesia       | 6905          | D           |
| AAM0158 | Buru              | Museum Zoologicum Bogoriense, Cibinong  | Indonesia       | 6908          | E           |
| AAM0163 | Sulawesi          | Museum Zoologicum Bogoriense, Cibinong  | Indonesia       | 7046          | E           |

|         |                |                                                 |           |        |   |
|---------|----------------|-------------------------------------------------|-----------|--------|---|
| AAM0165 | Sulawesi       | Museum Zoologicum Bogoriense, Cibinong          | Indonesia | 11952  | E |
| AAM0166 | Sulawesi       | Museum Zoologicum Bogoriense, Cibinong          | Indonesia | 12115  | B |
| AAM0178 | Togian Islands | Museum Zoologicum Bogoriense, Cibinong          | Indonesia | 15195  | D |
| AAM0180 | Sulawesi       | Museum Zoologicum Bogoriense, Cibinong          | Indonesia | 15197  | A |
| AAM0181 | Sulawesi       | Museum Zoologicum Bogoriense, Cibinong          | Indonesia | 15198  | A |
| AAM0197 | Sulawesi       | Zoologisk Museum, København                     | Denmark   | M1432  | C |
| AAM0198 | Sulawesi       | Zoologisk Museum, København                     | Denmark   | M1433  | E |
| AAM0211 | Buru           | Senckenberg Naturhistorische Sammlungen Dresden | Germany   | 607    | C |
| AAM0212 | Buru           | Senckenberg Naturhistorische Sammlungen Dresden | Germany   | 608    | D |
| AAM0214 | Buru           | Senckenberg Naturhistorische Sammlungen Dresden | Germany   | 1554   | E |
| AAM0215 | Buru           | Senckenberg Naturhistorische Sammlungen Dresden | Germany   | 1555   | B |
| AAM0216 | Buru           | Senckenberg Naturhistorische Sammlungen Dresden | Germany   | 1556   | C |
| AAM0220 | Buru           | Senckenberg Naturhistorische Sammlungen Dresden | Germany   | 2167   | D |
| AAM0222 | Sulawesi       | Senckenberg Naturhistorische Sammlungen Dresden | Germany   | 3070   | D |
| AAM0224 | Sulawesi       | Senckenberg Naturhistorische Sammlungen Dresden | Germany   | 3556   | E |
| AAM0287 | Buru           | Naturmuseum Senckenberg, Frankfurt Am Main      | Germany   | 427    | C |
| AAM0288 | Buru           | Naturmuseum Senckenberg, Frankfurt Am Main      | Germany   | 429    | E |
| AAM0289 | Buru           | Naturmuseum Senckenberg, Frankfurt Am Main      | Germany   | 430    | E |
| AAM0308 | Sulawesi       | Göteborgs naturhistoriska museum, Göteborg      | Sweden    | 4.728  | D |
| AAM0313 | Sulawesi       | Göteborgs naturhistoriska museum, Göteborg      | Sweden    | 17.934 | D |
| AAM0314 | Sulawesi       | Göteborgs naturhistoriska museum, Göteborg      | Sweden    | 17.935 | D |
| AAM0317 | Sulawesi       | Göteborgs naturhistoriska museum, Göteborg      | Sweden    | 17.938 | E |
| AAM0318 | Sulawesi       | Göteborgs naturhistoriska museum, Göteborg      | Sweden    | 17.939 | D |
| AAM0319 | Sulawesi       | Göteborgs naturhistoriska museum, Göteborg      | Sweden    | 17.940 | E |
| AAM0320 | Sulawesi       | Göteborgs naturhistoriska museum, Göteborg      | Sweden    | 17.941 | E |
| AAM0321 | Sulawesi       | Göteborgs naturhistoriska museum, Göteborg      | Sweden    | 17.942 | D |
| AAM0322 | Sulawesi       | Göteborgs naturhistoriska museum, Göteborg      | Sweden    | 17.943 | E |
| AAM0324 | Sulawesi       | Göteborgs naturhistoriska museum, Göteborg      | Sweden    | 17.945 | B |
| AAM0325 | Sulawesi       | Göteborgs naturhistoriska museum, Göteborg      | Sweden    | 17.946 | C |
| AAM0326 | Sulawesi       | Göteborgs naturhistoriska museum, Göteborg      | Sweden    | 17.947 | E |
| AAM0333 | Sulawesi       | Göteborgs naturhistoriska museum, Göteborg      | Sweden    | 17.954 | D |
| AAM0334 | Sulawesi       | Göteborgs naturhistoriska museum, Göteborg      | Sweden    | 17.955 | C |
| AAM0335 | Sulawesi       | Göteborgs naturhistoriska museum, Göteborg      | Sweden    | 17.956 | D |
| AAM0337 | Sulawesi       | Göteborgs naturhistoriska museum, Göteborg      | Sweden    | 17.958 | E |
| AAM0338 | Sulawesi       | Göteborgs naturhistoriska museum, Göteborg      | Sweden    | 17.959 | E |
| AAM0340 | Sulawesi       | Göteborgs naturhistoriska museum, Göteborg      | Sweden    | 17.961 | E |
| AAM0341 | Sulawesi       | Göteborgs naturhistoriska museum, Göteborg      | Sweden    | 17.962 | D |
| AAM0342 | Sulawesi       | Göteborgs naturhistoriska museum, Göteborg      | Sweden    | 17.963 | D |
| AAM0343 | Sulawesi       | Göteborgs naturhistoriska museum, Göteborg      | Sweden    | 17.964 | E |
| AAM0350 | Sulawesi       | Göteborgs naturhistoriska museum, Göteborg      | Sweden    | 17.971 | B |
| AAM0353 | Sulawesi       | Göteborgs naturhistoriska museum, Göteborg      | Sweden    | 17.974 | D |

|         |                |                                              |                 |                              |   |
|---------|----------------|----------------------------------------------|-----------------|------------------------------|---|
| AAM0354 | Sulawesi       | Göteborgs naturhistoriska museum, Göteborg   | Sweden          | 17.975                       | E |
| AAM0355 | Sulawesi       | Göteborgs naturhistoriska museum, Göteborg   | Sweden          | 17.976                       | E |
| AAM0356 | Sulawesi       | Göteborgs naturhistoriska museum, Göteborg   | Sweden          | 17.977                       | C |
| AAM0362 | Sulawesi       | Göteborgs naturhistoriska museum, Göteborg   | Sweden          | 17.983                       | D |
| AAM0364 | Sulawesi       | Göteborgs naturhistoriska museum, Göteborg   | Sweden          | 17.985                       | E |
| AAM0365 | Sulawesi       | Göteborgs naturhistoriska museum, Göteborg   | Sweden          | 17.986                       | E |
| AAM0366 | Sulawesi       | Göteborgs naturhistoriska museum, Göteborg   | Sweden          | 17.987                       | C |
| AAM0367 | Sulawesi       | Göteborgs naturhistoriska museum, Göteborg   | Sweden          | 17.988                       | D |
| AAM0368 | Sulawesi       | Göteborgs naturhistoriska museum, Göteborg   | Sweden          | 17.989                       | B |
| AAM0390 | Togian Islands | Naturalis Biodiversity Center, Leiden        | The Netherlands | 10607                        | C |
| AAM0394 | Buru           | Naturalis Biodiversity Center, Leiden        | The Netherlands | RMNH.MAM.28803               | C |
| AAM0395 | Buru           | Naturalis Biodiversity Center, Leiden        | The Netherlands | RMNH.MAM.28804               | D |
| AAM0397 | Buru           | Naturalis Biodiversity Center, Leiden        | The Netherlands | RMNH.MAM.28806               | D |
| AAM0399 | Buru           | Naturalis Biodiversity Center, Leiden        | The Netherlands | RMNH.MAM.28810               | A |
| AAM0401 | Buru           | Naturalis Biodiversity Center, Leiden        | The Netherlands | RMNH.MAM.28812               | B |
| AAM0402 | Buru           | Naturalis Biodiversity Center, Leiden        | The Netherlands | RMNH.MAM.28813               | D |
| AAM0403 | Buru           | Naturalis Biodiversity Center, Leiden        | The Netherlands | RMNH.MAM.28814               | E |
| AAM0404 | Buru           | Naturalis Biodiversity Center, Leiden        | The Netherlands | RMNH.MAM.28815               | C |
| AAM0405 | Buru           | Naturalis Biodiversity Center, Leiden        | The Netherlands | RMNH.MAM.28816               | B |
| AAM0409 | Buru           | Naturalis Biodiversity Center, Leiden        | The Netherlands | RMNH.MAM.28807[was(2)&43500] | C |
| AAM0447 | Buru           | Natural History Museum, London               | England         | 15.4.1.1_cranium             | E |
| AAM0458 | Buru           | Natural History Museum, London               | England         | 34.5.24.1                    | E |
| AAM0461 | Sulawesi       | Natural History Museum, London               | England         | 0.3.30.19                    | E |
| AAM0462 | Sulawesi       | Natural History Museum, London               | England         | 1.10.3.1                     | E |
| AAM0463 | Sulawesi       | Natural History Museum, London               | England         | 9.11.30.1                    | E |
| AAM0474 | Buru           | Natural History Museum, London               | England         | 67.4.12.223                  | D |
| AAM0479 | Sulawesi       | Natural History Museum, London               | England         | 0.3.30.18                    | E |
| AAM0504 | Buru           | Zoologische Staatssammlung München           | Germany         | ZSM1903_9461b                | B |
| AAM0506 | Buru           | Zoologische Staatssammlung München           | Germany         | ZSM1908_2728                 | D |
| AAM0507 | Buru           | Zoologische Staatssammlung München           | Germany         | ZSM1908_2729                 | E |
| AAM0527 | Buru           | American Museum of Natural History, New York | USA             | 90363                        | E |
| AAM0528 | Sulawesi       | American Museum of Natural History, New York | USA             | 152849a                      | E |
| AAM0531 | Sulawesi       | American Museum of Natural History, New York | USA             | 152851                       | E |
| AAM0534 | Sulawesi       | American Museum of Natural History, New York | USA             | 152858                       | D |
| AAM0535 | Sulawesi       | American Museum of Natural History, New York | USA             | 152859                       | D |
| AAM0541 | Togian Islands | American Museum of Natural History, New York | USA             | 153406                       | C |
| AAM0542 | Togian Islands | American Museum of Natural History, New York | USA             | 153407                       | C |
| AAM0543 | Togian Islands | American Museum of Natural History, New York | USA             | 153408                       | B |
| AAM0545 | Togian Islands | American Museum of Natural History, New York | USA             | 153410                       | C |
| AAM0546 | Togian Islands | American Museum of Natural History, New York | USA             | 153411                       | C |
| AAM0550 | Buru           | Oxford University Museum of Natural History  | England         | 23520                        | C |

|         |          |                                                |           |                  |   |
|---------|----------|------------------------------------------------|-----------|------------------|---|
| AAM0556 | Buru     | Oxford University Museum of Natural History    | England   | 15013            | C |
| AAM0559 | Buru     | Oxford University Museum of Natural History    | England   | 15016            | C |
| AAM0588 | Sulawesi | Naturhistoriska Riksmuseet, Stockholm          | Sweden    | A585922          | E |
| AAM0590 | Sulawesi | Naturhistoriska Riksmuseet, Stockholm          | Sweden    | A594471          | E |
| AAM0592 | Sulawesi | Naturhistoriska Riksmuseet, Stockholm          | Sweden    | A595087          | C |
| AAM0638 | Sulawesi | National Museum of Natural History, Washington | USA       | 145703           | E |
| AAM0641 | Sulawesi | National Museum of Natural History, Washington | USA       | 199884a          | E |
| AAM0643 | Sulawesi | National Museum of Natural History, Washington | USA       | 199885a          | E |
| AAM0646 | Sulawesi | National Museum of Natural History, Washington | USA       | 199887           | D |
| AAM0647 | Sulawesi | National Museum of Natural History, Washington | USA       | 199888           | E |
| AAM0649 | Sulawesi | National Museum of Natural History, Washington | USA       | 199890           | E |
| AAM0654 | Sulawesi | National Museum of Natural History, Washington | USA       | 199895           | D |
| AAM0657 | Sulawesi | National Museum of Natural History, Washington | USA       | 218065           | E |
| AAM0658 | Sulawesi | National Museum of Natural History, Washington | USA       | 218066           | C |
| AAM0659 | Sulawesi | National Museum of Natural History, Washington | USA       | 218067           | D |
| AAM0661 | Sulawesi | National Museum of Natural History, Washington | USA       | 219754           | E |
| AAM0662 | Sulawesi | National Museum of Natural History, Washington | USA       | 219755           | B |
| AAM0664 | Sulawesi | National Museum of Natural History, Washington | USA       | 219757           | D |
| AAM0666 | Sulawesi | National Museum of Natural History, Washington | USA       | 219759           | D |
| AAM0677 | Buru     | Zoologische Staatssammlung München             | Germany   | ZSM1913_0204     | E |
| AAM0689 | Sulawesi | National Museum of Scotland, Edinburgh         | Scotland  | A.L.351.74A-E    | D |
| AAM0702 | Sulawesi | Private H.M. Collection, Bogor                 | Indonesia | ForFac1          | E |
| AAM0710 | Sulawesi | Universitas Tadulako, Palu                     | Indonesia | Palu1            | A |
| AAM0712 | Sulawesi | Universitas Tadulako, Palu                     | Indonesia | Palu2            | E |
| AAM0713 | Sulawesi | Universitas Tadulako, Palu                     | Indonesia | Palu3            | E |
| AAM0714 | Sulawesi | Universitas Tadulako, Palu                     | Indonesia | Palu4            | C |
| AAM0771 | Sulawesi | Museum Wallacea, Universitas Haluoleo, Kendari | Indonesia | Unhalu ?1        | E |
| AAM0781 | Sulawesi | Museum Wallacea, Universitas Haluoleo, Kendari | Indonesia | Unhalu ?2        | B |
| AAM0890 | Buru     | Museum Zoologicum Bogoriense, Cibinong         | Indonesia | [Kayeli_hill_B1] | C |
| AAM0893 | Buru     | Museum Zoologicum Bogoriense, Cibinong         | Indonesia | [Kayeli_hill_B4] | B |
| AAM0894 | Buru     | Museum Zoologicum Bogoriense, Cibinong         | Indonesia | [Kayeli_hill_B5] | C |
